CORRECTION

## Correction: A data-driven approach to establishing cell motility patterns as predictors of macrophage subtypes and their relation to cell morphology

Manasa Kesapragada, Yao-Hui Sun, Kan Zhu, Cynthia Recendez, Daniel Fregoso, Hsin-Ya Yang, Marco Rolandi, Rivkah Isseroff, Min Zhao, Marcella Gomez

The Data Availability statement for this article is incorrect. The correct statement is: The complete dataset is available at <https://doi.org/10.5061/dryad.m0cfxpp8v> with a metadata file accompanying the dataset. The source code required to reproduce the findings of this study has been uploaded to the following GitHub repository: <https://github.com/Gomez-Lab/CellAnalysis>.

### Reference

1. Kesapragada M, Sun Y-H, Zhu K, Recendez C, Fregoso D, Yang H-Y, et al. A data-driven approach to establishing cell motility patterns as predictors of macrophage subtypes and their relation to cell morphology. PLoS One. 2024;19(12):e0315023. <https://doi.org/10.1371/journal.pone.0315023> PMID: [39739899](https://pubmed.ncbi.nlm.nih.gov/39739899/)

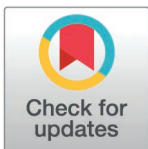

### OPEN ACCESS

**Citation:** Kesapragada M, Sun Y-H, Zhu K, Recendez C, Fregoso D, Yang H-Y, et al. (2026) Correction: A data-driven approach to establishing cell motility patterns as predictors of macrophage subtypes and their relation to cell morphology. PLoS One 21(4): e0346789. <https://doi.org/10.1371/journal.pone.0346789>

**Published:** April 7, 2026

**Copyright:** © 2026 Kesapragada et al. This is an open access article distributed under the terms of the [Creative Commons Attribution License](https://creativecommons.org/licenses/by/4.0/), which permits unrestricted use, distribution, and reproduction in any medium, provided the original author and source are credited.
